# Supplementary material for: Mortality and Cause of Death Among Youths Previously Incarcerated in the Juvenile Legal System
Source: PubMed Central journal article supplement (PMC8703246; doi:10.1001/jamanetworkopen.2021.40352), 2021-12-23
Supplement: jamanetwopen-e2140352-s001.pdf [file jamanetwopen-e2140352-s001.pdf]

## Supplemental Online Content

Ruch DA, Steelesmith DL, Brock G, et al. Mortality and cause of death among youth previously incarcerated in the juvenile legal system. *JAMA Netw Open*. 2021;4(12):e2140352.  
doi:10.1001/jamanetworkopen.2021.40352

### **eTable.** *ICD-10* Causes of Death

This supplemental material has been provided by the authors to give readers additional information about their work.

**eTable. ICD-10 Causes of Death**

| <b>Cause of Death</b>         | <b>ICD 10 Codes</b>                                                       |
|-------------------------------|---------------------------------------------------------------------------|
| Homicide / Legal Intervention | X85-Y09, Y87.1, Y35.0                                                     |
| Overdose                      | X40-X44                                                                   |
| Suicide                       | X60–X84, Y87.0, U03                                                       |
| Other                         |                                                                           |
| Natural Causes                | C81.9, C91.0, E14.1, F11.9, G40.9, I26.9, I38, I42.0, I42.9, I60.9, J18.0 |
| Accident                      | V03.1, V47.5, V89.2, X00                                                  |
| Unknown/Undefined             | R99, Y24                                                                  |
